1 **Cardiotoxic effects of methamphetamine associated with**  
2 **electrophysiological and epigenetic aberrations in**  
3 **Zebrafish**

4 Jimmy Zhang<sup>1</sup>, Anh H. Nguyen<sup>2,3</sup>, Lauren Schmiess-Heine<sup>2</sup>, Tai Le<sup>1</sup>, Xing Xia<sup>2</sup>, Hung Cao<sup>1,2,3\*</sup>

5

6

7

8

9

10

11

12

13 <sup>1</sup>Department of Biomedical Engineering, UC Irvine, Irvine, CA, USA.

14 <sup>2</sup>Department of Electrical Engineering and Computer Science, UC Irvine, Irvine, CA, USA.

15 <sup>3</sup>Sensoriis, Inc, Edmonds, WA, USA.

16 \*Corresponding author

17 Email: [hungcao@uci.edu](mailto:hungcao@uci.edu) (HC)

## 18 **Abstract**

19 Long-term methamphetamine abuse damages functional and molecular changes in the  
20 brain that causes chronic and relapsing disease. In this study, we sought to investigate a  
21 relationship between cardiotoxicity and arrhythmia with associated methamphetamine abuse in  
22 zebrafish to identify and to understand the adverse cardiac symptoms associated with  
23 methamphetamine as well as to assess the applicability of zebrafish as an appropriate model  
24 for cardiac-related drug screening studies. Over a two-week duration, zebrafish were first treated  
25 with various concentrations of methamphetamine, ranging from 0 to 50  $\mu$ M. Immediately after  
26 treatment, zebrafish underwent electrocardiogram (ECG) measurement for electrophysiological  
27 analysis. Results show that a higher incidence of increased heart rate over the duration of the  
28 experiment, corroborating with results from previous human case studies involving  
29 methamphetamine users. However, abnormalities commonly cited in those same case studies,  
30 such as prolongation of QTc, were not significantly presented in obtained ECG recordings. We  
31 have also conducted genetic, epigenetic, and histochemical analysis in an attempt to understand  
32 the cardiotoxic effects of methamphetamine on zebrafish cardiac function. These results  
33 suggested myocardial damage and decrease in gene expression associated with normal  
34 physiological function. Finally, this manuscript provides an analysis into potential reasons for the  
35 apparent discrepancies in our data with prior research as well as a future outlook of zebrafish  
36 cardiotoxic drug screening studies.

## 37 **Introduction**

38 Cardiotoxicity is one of the most adverse consequences of methamphetamine (Meth)  
39 abuse, leading to a notable increase of morbidity and mortality (1). Cardiovascular complications  
40 are the second leading cause of death in methamphetamine abusers. Cardiotoxicity can appear  
41 early in the course of the drug use and can cause numerous significant effects, such as

42 pulmonary hypertension, atherosclerosis, cardiac arrhythmias, acute coronary syndrome, and  
43 other associated cardiomyopathies (2). Furthermore, a Meth 'binge' study to determine long-  
44 term effects discovered that Meth decreased the sensitivity of nervous and cardiovascular  
45 physiology through successive treatments, implying the potential remodeling of physiological  
46 responses through chronic Meth abuse (3). However, data on the mechanism of the appearance  
47 of cardiac dysfunction during drug abuse and the susceptibility of long-term development of  
48 cardiotoxicity are limited. Therefore, better understanding of Meth abuse and early diagnosis of  
49 pre-clinical cardiac dysfunction in zebrafish, a relevant model for human cardiac studies, is  
50 essential in order to understand methamphetamine-induced cardiac toxicity.

51 Methamphetamines are sympathomimetic amines with a range of adverse effects upon  
52 multiple organ systems. Based around a phenylethylamine core, Methamphetamine and its  
53 analog, *d*-amphetamine, have high affinity with transporters associated with catecholamine  
54 signaling, significantly increasing the number of neurotransmitters such as dopamine and  
55 norepinephrine (1). Unlike methamphetamine, *d*-amphetamine has been prescribed as  
56 medication to treat neurological disorders such as attention deficit hyperactivity disorder (ADHD)  
57 and narcolepsy (4). A possible reason for limited legal Meth use is the addition of the *N*-methyl  
58 group compared to amphetamine, which has been shown to confer better penetration through  
59 the blood-brain barrier for Meth, leading to stronger and more addictive responses (5). Meth has  
60 been shown to induce heightened catecholamine response by promoting catecholamine release,  
61 preventing their reuptake, and destabilizing their levels (6, 7). Thus, Meth is responsible for  
62 numerous neurotoxic symptoms (7). Given the elucidation of the direct mechanism of Meth on  
63 neurological response, the major focus in researching treatments for Meth-related abuse has  
64 been associated with neurological modulation. Therefore, less attention was given to  
65 researching the direct mechanism of methamphetamine in other physiological systems, such as  
66 the cardiovascular system.

67           Despite the prevailing issue of Meth abuse, studies have shown that cardiac pathology  
68 induced by Meth can be attenuated and even reversed through the discontinuation of Meth use  
69 and the initiation of subsequent treatment (8). A study in rats regarding the administration of  
70 Meth and eventual withdrawal revealed that the rats were able to recover from myocardial  
71 pathologic symptoms such as atrophy, fibrosis, and edema starting from 3 weeks after  
72 discontinued Meth administration (9). A human case study indicated that attenuation of Meth  
73 use and subsequent therapy led to recovery from ventricular hypertrophy and ECG ST  
74 deviations (10). Evidence of recovery from Meth abuse has given promise to future potential  
75 treatments, but it also necessitates the research to understand the specific mechanism behind  
76 Meth-induced cardiovascular pathologies.

77           Although current research has not fully proven whether the single ventricular heart of  
78 zebrafish is comparable to the more complex ventricular conduction system found in higher  
79 vertebrates, zebrafish have been proposed as a versatile model system for researching  
80 biological applications due similarities with humans pertaining to cardiac physiology. Zebrafish  
81 has also emerged as a high-throughput and low-cost animal research model that has been used  
82 for phenotype-driven drug screenings for new insights into chemical toxicity due to similar drug  
83 metabolism and genetic homology (11). Regarding electrocardiography, previous research in  
84 our lab with *in vivo* surface electrocardiography for adult zebrafish was reported with a  
85 remarkable similarity used for studies of irregular heartbeats and QT prolongation (12). As such,  
86 *in vivo* ECG for adult zebrafish would be a powerful tool for cross-sectional and longitudinal  
87 studies for Meth-induced cardiac toxicity. In this study, we attempt to demonstrate the potential  
88 of zebrafish ECG in the diagnosis of Meth-induced cardiotoxicity. Developing techniques allow  
89 for the accurate and reproducible detection of irregular arrhythmic symptoms, enabling  
90 early ECG-based detection of cardiac dysfunction for drug abusers, further defining ECG as a  
91 suitable benchmark test for the extent of Meth-induced cardiotoxicity.

## 92 **Materials and Methods**

### 93 **Zebrafish Husbandry and Experimental Preparation**

94 Wild-type zebrafish were housed in a custom built circulating fish rack system. The water  
95 environment was maintained at 28° C, ~pH 7.0, and was checked at least once daily. The system  
96 is equipped with four filters, a UV, carbon, and two particle filters. Zebrafish were kept under the  
97 14:10 hour light/dark cycle. All zebrafish used in this study were wild-type strain obtained from  
98 UCLA and were approximately 1 year old at the onset of the experiment. Prior to  
99 methamphetamine treatment, zebrafish underwent open chest surgery to improve subsequent  
100 ECG signal acquisition. Under a stereo microscope, scales (above the coelomic cavity and the  
101 posterior site above the tail) were removed with forceps, exposing flesh, to allow more direct  
102 electrode contact. A small incision, ~2-3 mm, was made on the ventral surface of the fish above  
103 the heart. The incision cut through the chest wall and the heart was visible afterward. The fish  
104 were recovered in fresh fish water for a few minutes. The incision was not closed via suture,  
105 staple, clips, or glue as chest wall and scales have been observed to regrow within 4 weeks.  
106 Fish will regrow scales and recover fully within 4 weeks. The 4 zebrafish groups were then  
107 housed in separate tanks throughout the duration of the study. Fish were checked every day  
108 until the experiment has concluded, to see whether the animal was slow or showed some  
109 abnormal activities (*i.e.*, erratic swimming, strained breathing, bloating). In those cases, the fish  
110 would be euthanized in accordance to IACUC guidelines.

111

## 112 **Drug preparation and Methamphetamine Treatment**

113           The various concentrations (0, 25, 40, and 50  $\mu$ M) of methamphetamine solutions for  
114 treatment were prepared by mixing the specified amount of methamphetamine stock into water  
115 obtained from the fish rack system on the day of treatment. The methamphetamine stock (1  
116 mg/mL) was obtained from Sigma-Aldrich (MDL MFCD00056130). The solution (~10 mL) was  
117 then placed in a small custom PDMS chamber suitable for housing one zebrafish. Each zebrafish  
118 was treated in the designated concentration of methamphetamine solution for 20 minutes before  
119 ECG recording.

## 120 **ECG recording procedure and Instrumental Setup**

121           ECG was obtained using the instrumental setup depicted in **Fig 1a**. Prior to placing the  
122 fish in the designated zebrafish station, the fish was first anesthetized in tricaine (200 mg/L) for  
123 approximately 3 minutes until the fish became unresponsive to external stimulus. Then, the fish  
124 was placed ventral side up in a precut crevice in the middle of the sponge. The sponge was then  
125 placed on a glass platform with the pin electrodes as positioned in **Fig 1a**, where the green  
126 working electrode was placed near the open incision on the chest while the yellow reference  
127 electrode was placed near the lower abdomen. Each fish underwent recording for approximately  
128 1 minute before placing in regular fish water for recovery from anesthesia. Treatment  
129 concentrations and durations were approved by University of California-Irvine's IACUC.

130

**Fig 1. Zebrafish ECG Setup.** (a) The figure on the left shows the general layout of zebrafish and electrodes during ECG recording. Inlet figure displays the actual setup in lab. The working electrode is shown in green and contacts the chest cavity. The reference electrode is shown in yellow and contacts near the tail. This electrode setup connects with instruments outlined in the block diagram on the right, where signals are processed and displayed on the laptop. (b) Representations of ECG signal processing with labeled waveforms utilizing custom Matlab software. The top displays the orange raw signal, while the bottom displays the blue processed signal.

131 The components of instrumental setup consisted of the following (**Fig 1a**). The pin  
132 electrodes were derived from isolating ends of jumper wires (Austor Part AMA-18-580) and  
133 stripping the outer insulator layer of the wire about 2 cm from the metal tip of the wires. The  
134 exposed copper wires underneath were then soldered to improve signal integrity and electrode  
135 longevity. The pin electrodes were attached to alligator clips at the end of a cable wire leading  
136 to the differential AC amplifier (A-M Systems Model 1700). The cable wire was wrapped with  
137 aluminum foil and grounded to reduce external electrical noise. The signal from the zebrafish  
138 underwent 10000x amplification before undergoing digitalization with the data acquisition box  
139 (National Instruments Model USB-6001). The signal was then transmitted to a laptop (Dell  
140 Latitude E5470), where the processed ECG signal was displayed using the LabView interface.  
141 Examples of ECG recordings are shown in **Fig 1b**.

142

## 143 **ECG data collection and analysis**

144 ECG signals were saved as a text file using the LabView interface. The ECG was  
145 subsequently analyzed using a custom-designed MATLAB software to determine the positions  
146 of ECG waves for each recording. Briefly, the MATLAB m-file first loaded and plotted the ECG  
147 data from the output text file from LabView. The m-file then determined locations of peaks  
148 corresponding to R waves via local maximum detection. After a denoising step, the P, Q, S, and

149 T waves were then determined based on predetermined parameters and deviations from the R  
150 waves. Finally, relevant statistics such as the QTc duration based on the Bazett formula and  
151 heart rate (HR) were calculated and tabulated in an output Excel file corresponding to each ECG  
152 data file. Prior to subsequent analysis, each data file was reviewed for accurate ECG wave  
153 detection by determining that the locations of P, Q, R, S, and T waves depicted by the software  
154 conform to the corresponding peaks/troughs on the ECG.

155

156 Bazett Formula:  $QTc = \frac{QT \text{ Interval}}{\sqrt{RR \text{ Interval}}}$

157

## 158 RT-PCR Analysis

159 Zebrafish were euthanized and homogenized. RNA was successfully isolated following  
160 the TRIzol<sup>®</sup> reagent protocol (Invitrogen). Subsequent first strand synthesis of cDNA was  
161 conducted following the protocol of M-MLV reverse transcriptase (Promega). qPCR was  
162 conducted with SYBR-Green reagent and analyzed with the Quantstudio Real-Time PCR  
163 System. DNA primers used for qPCR are shown in **Table 1**.

164 **Table 1. List of Primers used for RT-PCR**

| Name        | Accession No.<br>(NCBI) | Product<br>size<br>(bp) | Primer Sequence                                           |
|-------------|-------------------------|-------------------------|-----------------------------------------------------------|
| <i>MBD3</i> | NM_212769.1             | 120                     | F: 5'-GTCCAACAGGGAAGAAG-3'<br>R: 5'-GGCAGAGACGTGTTTCAG-3' |
| <i>MBD2</i> | NM_212768.1             | 105                     | F: 5'-GAGCTCAGCAGCTAGC-3'<br>R: 5'-CCGTCCTCTTCTTCTC-3'    |



|               |                |     |                                                              |
|---------------|----------------|-----|--------------------------------------------------------------|
| <i>MBD1</i>   | BC124166.1     | 102 | F: 5'-GAAGGTGAAGATGC-3'<br>R: 5'-TTCAGCTTCTTCAC-3'           |
| <i>PRMT4</i>  | NM_001007183.2 | 98  | F: 5'-GAAGCTGCACTGGT-3'<br>R: 5'-GTGGAACTCGTATC-3'           |
| <i>NNMT</i>   | NM_001372046.1 | 105 | F: 5'-GACATCGGCTCTGGC-3'<br>R: 5'-CAGCACCTGCTTGAC-3'         |
| <i>LCMT1</i>  | NM_001004645.2 | 105 | F: 5'-CACCTGAGATCAACAG-3'<br>R: 5'-GGTTTCGATAGTGGAG-3'       |
| <i>EHMT2</i>  | NM_001113615.1 | 120 | F: 5'-GAGACAGAGCCGCAGC-3'<br>R: 5'-GAGACTGTCTGCTGCT-3'       |
| <i>EHMT1b</i> | XM_021468789.1 | 109 | F: 5'-GCCAAGGACCAAGTC-3'<br>R: 5'-CGTGCACGATGTAAGT-3'        |
| <i>COMTA</i>  | NM_001030157.2 | 112 | F: 5'-CACGATGTGGTCCATC-3'<br>R: 5'-GCGATGACGCTCTCTG-3'       |
| <i>DMNT3a</i> | NM_001328167.1 | 103 | F: 5'-CACTCCACGCTGGAC-3'<br>R: 5'-TCGTGCACTTCTCC-3'          |
| <i>DMNT3b</i> | NM_001020476.2 | 98  | F: 5'-GAAGCTCGTGATGGTC-3'<br>R: 5'-TGTCAGACTCTTCTC-3'        |
| <i>DMNT1</i>  | NM_131189.2    | 110 | F: 5'-GCCTGAAGCTGAGAATGC-3'<br>R: 5'-CTCATCGGTTAACATCTC-3'   |
| <i>KCNH2</i>  | NM_001044931.1 | 103 | F: 5'-CACCTGGGACTGGGTGATC-3'<br>R: 5'-TGTGGAAATTCAGCACAAT-3' |
| <i>KCNQ1</i>  | NM_001123242.2 | 112 | F: 5'-GATGCCGGAGTAAATATGT-3'                                 |

|       |             |     |                                                             |
|-------|-------------|-----|-------------------------------------------------------------|
|       |             |     | R: 5'-GGACTCCTCTGACAGCAG-3'                                 |
| SCN5A | NM_198056.3 | 110 | F: 5'-GGAAGTGGCTGGACTTTAG-3'<br>R: 5'-CTGGATCAGGGCCCCCAG-3' |

165

## 166 Protein Extraction and Dot Blot Analysis

167 After treatment of zebrafish with aforementioned methamphetamine concentrations (25,  
168 40, and 50  $\mu$ M), the zebrafish were euthanized and homogenized. Their proteins were extracted  
169 with the TRIzol<sup>®</sup> reagent and protocol (Invitrogen). In brief, whole zebrafish (~400 mg.) are gently  
170 pipetted in a 1.5 mL Eppendorf (EP) tube. The zebrafish tissues were homogenized by liquid  
171 nitrogen before being incubated in 1 mL TRIzol<sup>®</sup> on ice for 5 min. The extract was centrifuged at  
172 13,000 rpm at 4°C for 45 min and the supernatant was collected into a fresh 1.5 mL EP tube.  
173 200  $\mu$ L of Chloroform was added and mixed thoroughly, left the tube on ice for 5 min, and  
174 centrifuged at 13,000 rpm at 4°C for 15 min. After removing aqueous phase for RNA and  
175 precipitating DNA by ethanol, proteins were precipitated by adding 1.5 mL isopropanol, mix  
176 thoroughly and incubate for 10 min at room temperature. The extract was centrifuged at 12,000  
177 rpm at 4°C for 10 min, supernatant was discarded. 2 mL of 0.3 M guanidine hydrochloride solution  
178 was added and incubate for 20 min at room temperature. The sample was centrifuged at 12,000  
179 rpm at 4°C for 5 min, discard the supernatant. The protein pellet was washed with 2 mL of ethanol  
180 and dried for 5 min. The protein pellet was resolubilized with 1mL of 1% SDS solution, the  
181 supernatant was collected after centrifuge at 12,000 rpm at 4°C for 10 min, ready to use for  
182 subsequent protein analysis. Extracted proteins were dissolved in 1% SDS. The protein solution  
183 was then dropped on a nitrocellulose membrane (GE Healthcare Protran<sup>®</sup> BA85) to form 2  $\mu$ L  
184 and 5  $\mu$ L dots for each concentration group. After 1 hour of incubation, the membrane was then  
185 blocked with TBST including 1% BSA for 1 hour, followed by an overnight incubation with the

186 anti-methamphetamine antibody (mouse, 10M25A Fitzgerald). After washing the membrane with  
187 TBST, the membrane was then incubated with HRP conjugated anti-mouse IgG (R&D Systems)  
188 for 4 hours. After additional washing, the membrane was then incubated in Pierce™ ECL  
189 Western Blotting Substrate (Thermo Scientific) and imaged for chemiluminescence.

190

## 191 **Histochemical Staining with Masson's Trichrome Stain**

192         After treatment of methamphetamine, zebrafish hearts were isolated as described in  
193 previous literature (13). Briefly, the fish were anesthetized by tricaine before undergoing chest  
194 incisions. The heart was then located and excised, which were then placed in a solution of  
195 perfusion buffer (10 mM HEPES, 30 mM taurine, 5.5 mM glucose and 10 mM BDM in 1x PBS  
196 solution). After excision of all hearts, they were subsequently fixed by 4% formaldehyde and  
197 cryosectioned with a cryostat. The tissue slices were placed onto frosted microscope slides  
198 (Thermofisher Scientific) and underwent Masson's Trichrome staining (following the provided  
199 protocol from American Master Tech, TKMTR2). The slides were observed under the  
200 microscope for subsequent analysis of collagen and myocardium distribution for cardiac injury  
201 analysis.

202

## 203 **Antibodies for Immunostaining and ELISA Analysis**

204         Protein extraction by TRIzol<sup>®</sup> reagent was conducted prior to ELISA. Heart tissue samples  
205 were fixed and sectioned with the aforementioned procedure prior to immunostaining. The  
206 antibodies used for immunostaining and ELISA were mouse anti-methamphetamine antibody  
207 (mouse, 10M25A Fitzgerald), anti-MBD2 (ab45027; Abcam), anti-DNMT1 antibody (mouse,  
208 ab13537; Abcam) and the secondary antibodies used were goat anti-mouse IgG-HRP (ab6789;  
209 Abcam), goat anti-mouse IgG H&L (Alexa Fluor<sup>®</sup> 488) (ab150113, Abcam).

## 210 **Statistical analysis**

211 All parameters derived from data analysis (*i.e.*, QTc, HR) were averaged within each  
212 experimental group. Statistical significance was determined by the one-way ANOVA test  
213 between experimental groups with significance level  $p < 0.05$ .

## 214 **Results**

### 215 **Significant Dose-Response Increase in Heart Rate but not in QTc** 216 **from Methamphetamine Treatment**

217 Zebrafish has been a favorable model for drug screening experiments, including  
218 methamphetamine. Indeed, most studies regarding zebrafish methamphetamine treatment  
219 concern the neuropsychological effects of methamphetamine, owing to the ability of  
220 methamphetamine to enhance catecholamine neurotransmitters (14, 15). Studies of zebrafish  
221 cardiotoxicity in response to methamphetamine administration are scarcer. Fang *et al.*  
222 conducted a methamphetamine cardiotoxicity study by treating 48 hpf (hours post fertilization)  
223 zebrafish embryos with up to 24 hours of methamphetamine administration, documenting  
224 decreased heart rate and abnormal morphological changes such as edema and hemorrhage  
225 (16). To this end, we sought to verify and expand on their results through our methodology in  
226 ECG acquisition, as arrhythmia was a prominent cardiotoxic symptom in methamphetamine  
227 abusers (1). Our lab previously developed modalities in acquiring ECG from adult zebrafish and  
228 successfully identified abnormal ECG characteristics (12). Using an ECG setup designed in our  
229 lab (**Fig 1**), we acquired ECG signals over a two week period. Each experimental group is treated  
230 with the designated methamphetamine concentration for 20 minutes for 3 instances per week,

231 and their ECG was subsequently acquired after treatment. The signals were then processed to  
232 eliminate external noise, and parameters such as heart rate and QTc were then quantified. **Fig**  
233 **2a** comprises representative ECG figures obtained from our ECG system, including ECG  
234 diagrams obtained before methamphetamine administration as well as 7 days and 14 days after  
235 first administration. **Fig 2b** is a representation of a pathogenic progression of ECG signals due  
236 to methamphetamine treatment. The evident increase of heart rate and sporadic signs of QTc  
237 prolongation were seen after the first and second weeks of treatment. Through our analysis of  
238 ECG recordings of zebrafish treated at varying concentrations of methamphetamine over the  
239 period of 2 weeks, a significant increase in heart rate was noted for all zebrafish groups treated  
240 with methamphetamine compared to zebrafish not treated with methamphetamine (**Fig 2a**),  
241 which is consistent with previous studies of methamphetamine users displaying monomorphic  
242 ventricular tachycardia (17). However, our data indicated that significant QTc prolongation did  
243 not occur due to methamphetamine treatment (**Fig 3**). This seemingly contradicts with results  
244 obtained from previous human medical case studies, as those cases reported significant signs  
245 of QTc prolongation in methamphetamine users (18, 19). Comparison between heart rate and  
246 QTc for individual measurements (**Fig 3a**) revealed that there was no significant correlation  
247 between heart rate and QTc. Furthermore, heart rate tended to display a wider range of values  
248 than for QTc across treatment groups, supporting the previous analysis that methamphetamine  
249 induces a more significant change in heart rate than in QTc. Heart rate values for each treatment  
250 group were more delineated, as values from the control group were colocalized at the lower  
251 range of heart rates (mean = 87.4 bpm), whereas values from the 50  $\mu$ M treatment group were  
252 colocalized at the higher range (mean = 94.6 bpm). QTc results did not display the same  
253 discrimination as in heart rate, as values were congregated regardless of experimental group.  
254 This was corroborated by measuring the variation in heart rate in each group, as the variations

255 remain relatively similar regardless of experimental treatment. While some outliers populated  
256 the high extreme values of QTc, the majority of QTc values were congregated.

## 257 **Lack of significant differences in ECG Characteristics between** 258 **Treatment Groups**

259 While significant differences can be found for heart rate between zebrafish treated and not  
260 treated with methamphetamine, other characteristics, including ST interval and RR interval, do  
261 not show significant correlation. According to the odds analysis shown in **Fig 3d**, only QTc, heart  
262 rate, and RTc have shown significant differences between methamphetamine-treated and  
263 untreated groups (OR > 2.5). A closer inspection of the odds ratios indicate that the significance  
264 was fairly weak for RTc and QTc, which was corroborated by T-tests conducted above. Other  
265 parameters that were studied, such as ST interval, have an odds ratio below the significant value.

**Fig 2. Analysis of ECG Before and After Treatment.** (a) This representative figure indicates the ECG signals before treatment, labeled as 'Baseline', as well as signals obtained at 7 and 14 days after the onset of methamphetamine treatment. ECG waveforms were labeled for the initial ECG wave. The progression of ECG signals depict an increase in heart rate after onset of treatment, with sporadic cases of QTc prolongation. (b) Representation of average QTc measured for each experimental group across the duration of treatment, indicating an increase of QTc, but at an insignificant level.

**Fig 3. Comparison of QTc and HR across Experimental Groups for Significance.** Correlations of heart rate and QTc (a) and correlation of RR interval and QTc (b), indicating a general positive correlation between heart rate and QTc. (c) Correlation of baseline QTc values obtained before methamphetamine treatment with peak QTc measurements obtained during the course of the treatment, suggesting a general prolongation of QTc. (d) Odds analysis of ECG parameters, indicating the likelihood of significant changes before and after methamphetamine treatment. As shown, RTc, QTc, and heart rate indicate significant changes with OR>2.5.

266 **Sporadic dysregulation of ST interval and other ECG**  
267 **characteristics after Methamphetamine Treatment**

268 While certain ECG parameters do not display significance between treatment groups, an  
269 analysis into the variability of these parameters revealed interesting results. Notably, the  
270 variability in ST interval increases at higher concentrations (**Fig 4**). While the mean ST interval  
271 calculated was not significantly different at all methamphetamine concentrations, the sporadic

**Fig 4. Analysis of specific ECG parameters between experimental groups.** Aggregate measurements were plotted for each experimental group for comparative analysis. Based on significance testing, heart rate exhibited significant increases across all experimental groups, supporting that methamphetamine induces increased heart rate in zebrafish. Other parameters (QTc, RTc, and ST) displayed little to no significance across experimental groups. \* indicates  $p < 0.05$ . *ns* indicates no significance.

272 presence of increasing ST interval duration as methamphetamine concentration increases  
273 indicated the propensity of ST interval to vary after methamphetamine dosage. This pattern was  
274 not seen in QTc and heart rate, as the variation of both parameters remain similar throughout all  
275 treatment groups. Interestingly, RTc also displayed a similar variation to ST, but it would seem  
276 that the difference in RTc would be attributed to ST. While the significance of a prolonged ST  
277 interval is not well understood, a previous manuscript documented that ST interval prolongation  
278 could be associated with left ventricular hypertrophy (20). This could be explained by realizing  
279 that the increase in ventricular volume potentially increases the distance that the Purkinje fibers  
280 have to cover for both ventricular depolarization and repolarization, increasing the ST interval.

281

## 282 **Ion Channel Dysfunction Associated with Methamphetamine** 283 **Treatment**

284 While we did not observe significant changes in ECG signals between methamphetamine  
285 treated and untreated groups aside from heart rate, we wanted to determine if  
286 methamphetamine has induced cardiotoxic damage in cardiac tissue. Through our dot blot



287 analysis to detect methamphetamine within zebrafish tissue, we were able to determine that  
288 methamphetamine does retain within zebrafish after treatment in a dose-response manner (**Fig**

**Fig. 5. Genetic Analysis of Methamphetamine Treatment on Zebrafish.** (a) The degree of expression of genetic and epigenetic genes in comparison between experimental groups. Results indicate that *MBD1-3*, *NNMT*, *EHMT1*, *DNMT1*, and *DNMT3A-B* exhibit the greatest progressive fold change in expression as methamphetamine dosage treatment increases. *SCN5A*, a sodium channel gene common in arrhythmic syndromes, has also been upregulated by methamphetamine treatment. (b-d) Quantification of expression changes based on functionality of epigenetic proteins (categorized as DNA methylation, histone methylation and acetylation, and methyl-binding proteins). The protein expression across all categories is increased in methamphetamine treated group (25  $\mu$ M), with the difference being significant in DNA methylation proteins and methyl-binding proteins. (e) Comparison of protein expression of *MBD2*, a methyl-binding protein, producing the most pronounced difference in expression between control and 25  $\mu$ M treated group. (f) Dot blot diagram of methamphetamine detection retained in zebrafish tissue, indicating that methamphetamine does retain in zebrafish tissue in a dose-dependent response. (g) Representative trichrome-stained heart sections from zebrafish treated at various concentrations of methamphetamine. \* indicates significance with  $p < 0.05$ . *ns* indicates no significance.

289 **5f)** We chose to investigate and genetic and histological consequences of methamphetamine  
290 treatment in zebrafish. To analyze molecular roles of methamphetamine in inducing  
291 cardiotoxicity, we conducted RT-PCR of several genes associated with ion channels. These  
292 potassium and sodium ion channel genes (*KCNH2*, *KCNQ1*, *SCN5A*) have been selected due  
293 to their arrhythmogenic property seen in arrhythmic disorders (21). While the potassium ion  
294 channel genes *KCNH2* and *KCNQ1* indicated no significant expression changes, *SCN5A*  
295 displayed significant upregulation in the methamphetamine treated groups compared to the  
296 untreated group (**Fig. 5a**). *SCN5A* corresponds to the sodium channel protein  $Na_v1.5$ . Through  
297 previous studies involving the characterization of gain-of-function *SCN5A* mutations,  
298 upregulation of the sodium ion channel is known to be a factor in several arrhythmic diseases,  
299 including Brugada and long QT syndromes, as well as cardiovascular diseases such as cardiac  
300 hypertrophy and heart failure (22, 23). Therefore, methamphetamine treatment had been  
301 demonstrated to potentially induce arrhythmogenic consequences directly due to dysregulation  
302 of certain ion channel expressions and functions.

## 303 **Transcriptional repression as an epigenetic change due to** 304 **methamphetamine treatment**

305 To further analyze the genetic consequences of methamphetamine treatment, we determined  
306 the expression changes of epigenetic factors in zebrafish after methamphetamine treatment.  
307 From our analysis, the most noteworthy result shown was the expression change in *MBD2*.  
308 Zebrafish treated with 25  $\mu$ M methamphetamine resulted in an approximately 3-fold change in  
309 *MBD2* compared to those in the control group (**Fig 5e**). *MBD2* corresponds a transcriptional  
310 repressor that specifically binds to CpG sites formed from DNA methylation, so the upregulation  
311 of *MBD2* is an implication of long-term repression of genes. Analysis of other potential epigenetic  
312 factors potentially affected by methamphetamine treatment yielded similar results. In the  
313 diagram depicted in **Fig 5a**, the factors that have underwent a significant fold change (by at least  
314 2 fold) include *MBD1-3*, *NNMT*, *EHMT1*, *DNMT1*, and *DNMT3A-B*. These factors are mainly  
315 involved in the various forms of methylation, including DNA methylation and histone methylation.  
316 These results were also supported through our quantification of the expression of DNA  
317 methylation, histone modifications, and methyl-binding proteins between the control group and  
318 the 25  $\mu$ M treatment group (**Fig 5b-d**). As demonstrated in a previous study analyzing epigenetic  
319 influences in *SCN5A* expression, *SCN5A* dysregulation was associated with epigenetic  
320 regulations (24). Thus, the upregulation of DNA methylation could potentially be linked with the  
321 dysregulation of pertinent ion channel genes such as *SCN5A*. Interestingly, our results yielded  
322 a significant difference between the control and treatment groups for DNA methylation and  
323 methyl-binding proteins, but not for histone modifications. Histone modifications are generally  
324 associated with short-term, reversible forms of genetic repression, whereas DNA methylation is  
325 correlated with long-term and stable genetic repression (25). Masson's trichrome stains were  
326 performed in cardiac cryosections in which myocardial fibrosis are indicated in blue at 40 and 50

327  $\mu\text{M}$  of Meth, compared to that of control ( $0 \mu\text{M}$ ) and  $25 \mu\text{M}$  of Meth (**Fig. 5h**). These results were  
328 also corroborated through our histological analysis, by specific antibodies in fluorescent  
329 immunohistochemistry (**Fig 6**), further supporting that methamphetamine induces an  
330 upregulation in both DNA methylation and subsequent transcriptional repression.

331

## 332 Discussion

333 The methamphetamine epidemic continues to fester worldwide, and cardiovascular  
334 diseases are the leading cause of death for methamphetamine abusers. Utilizing animal models  
335 to study cardiovascular associated mechanisms could be critical in devising treatments for  
336 methamphetamine associated diseases. The zebrafish is an excellent model for drug screening

### **Fig 6. Representative Immunostaining of Methamphetamine and Epigenetic Proteins.**

(a) Brightfield image of zebrafish heart tissue. (b-d) Immunostaining of methamphetamine (b), DNMT (c), and MBD (d) within heart tissue of methamphetamine treatment group. Antibodies were conjugated with Alexa Fluor 488 to indicate presence of proteins with green fluorescence. Magnification of images 40X

337 studies due to high fecundity, low maintenance, and similar genetic homology to that in humans.  
338 As the zebrafish model is constantly evolving, studies have continued to delineate the  
339 applicability of the zebrafish in human medical research. During the initial conception of this  
340 study, we have sought to 1. Establish the zebrafish model as an adequate model of drug  
341 screening for cardiotoxic effects, and 2. Elucidate the role of methamphetamine in inducing long-  
342 term cardiotoxic effects. Utilizing our custom built zebrafish ECG acquisition system in our lab,  
343 we were able to acquire ECG from zebrafish during the two-week treatment period with  
344 methamphetamine. Based on our results, we determined that heart rate has increased  
345 significantly during the two-week period due to methamphetamine treatment through comparison

346 of heart rate between zebrafish treated with methamphetamine and zebrafish that were treated  
347 in normal fish water. Additionally, we conducted an analysis on possible gene targets of  
348 methamphetamine that are associated with cardiotoxicity and discovered that *SCN5A*, a cardiac  
349 sodium ion channel gene commonly associated with arrhythmogenic syndromes, was  
350 significantly upregulated due to methamphetamine treatment. Previous studies have shown that  
351 deregulation of these genes have resulted in deterioration in cardiac physiology, including the  
352 presence of prolonged QTc (26). These results were consistent with previous human case  
353 studies (1). Additionally, we have conducted some experiments to analyze possible  
354 methamphetamine-induced epigenetic changes, and results indicated that methamphetamine  
355 intake was correlated with an increased amount of DNA methylation and associated gene  
356 repression. Similar results have been documented for methamphetamine-induced addiction  
357 studies in other animal models (27, 28). While hypermethylation could possibly be associated  
358 with the upregulation of ion channel genes and the subsequent dysregulation of cardiac rhythm,  
359 the exact mechanism linking these epigenetic and physiological changes remains unknown. In  
360 the future, experiments should be conducted to determine the gene targets of hypermethylation.  
361 Nevertheless, our results have indicated the propensity of methamphetamine to induce  
362 cardiotoxicity in zebrafish through genetic and epigenetic means.

363 While some associations have been determined between methamphetamine treatment  
364 and pathologic symptoms shown on ECG in zebrafish, the significance is not very evident. For  
365 example, there is currently no explanation on why a dose-response increase in  
366 methamphetamine was not seen in certain relevant parameters in ECG. While the dose-  
367 response was evident when measuring heart rate, the determination of significance in other  
368 parameters was less apparent, such as the presence of QTc changes in response to variations  
369 of treated methamphetamine concentrations. QTc prolongation has long been regarded as a

370 prominent symptom in methamphetamine users, and in some isolated cases in this study, QTc  
371 prolongation can be seen on ECG signals. However, statistical analysis indicated that there were  
372 no significant QTc changes due to methamphetamine treatment. Despite the lack of significance,  
373 methamphetamine was confirmed to successfully retain within the zebrafish after treatment, as  
374 verified by our dot blot experiment. Methamphetamine retention in zebrafish was also  
375 demonstrated in a previous zebrafish study (29). We surmise that methamphetamine might pose  
376 an antagonizing interaction with tricaine, the anesthetic agent used to acquire ECG. Both  
377 methamphetamine and tricaine have opposing mechanisms, as methamphetamine is a stimulant  
378 while tricaine is an established anesthetic, known for preventing action potential firing by  
379 blocking voltage-gated sodium channels (30). Tricaine has also been shown to prolong the Q-T  
380 interval as well, which could also confound zebrafish ECG results (31). Most zebrafish  
381 methamphetamine studies focused on the neuropsychological effects of methamphetamine,  
382 which were conducted using behavioral tests and without the need for tricaine (32). Therefore,  
383 future improvements should be implemented to reduce the effect of tricaine for zebrafish  
384 cardiotoxic studies, as tricaine could introduce confounding circumstances, especially when  
385 testing psychostimulants on zebrafish. Future studies should also seek to explain the effect of  
386 these chemical entities on ion channel function through analysis of sodium and calcium  
387 transients for zebrafish. These future experiments would determine the mechanism of  
388 methamphetamine in inducing cardiotoxicity as well as bolster the use of zebrafish as a suitable  
389 model for cardiotoxic studies.

390         Additionally, future directions would also include linking neurotransmitter response to  
391 cardiovascular abnormalities in zebrafish as well as an investigation on ion channel function in  
392 the heart after methamphetamine administration. The zebrafish model has already been utilized  
393 in numerous methamphetamine studies, mostly related to behavioral studies due to

394 methamphetamine's known ability to disrupt dopamine release and reuptake, thus increasing  
395 dopamine expression (33). Therefore, it would be intriguing to understand the role of dopamine  
396 in methamphetamine-induced cardiotoxicity, as it would explain whether methamphetamine-  
397 induced cardiotoxicity is caused by dopamine or through a direct effect from methamphetamine.  
398 One consequence of dopamine response is the change in ion channel expression. Studies have  
399 shown the modulation of L-type calcium channels by methamphetamine, but it is not fully  
400 understood whether methamphetamine alters calcium channel function directly or via dopamine  
401 (28, 34, 35). Overall, more future studies should be planned to elucidate the mechanism of  
402 methamphetamine-induced cardiotoxicity.

403

## 404 **Acknowledgements**

405 The authors would like to acknowledge the financial support from the NSF CAREER  
406 Award #1917105 (H.C.) and the NSF #1936519 (H.C). We also thank Lauren Schmiess-Heine  
407 for managing the zebrafish facility.

408

## 409 **References**

- 410 1. Kevil CG, Goeders NE, Woolard MD, Bhuiyan MS, Dominic P, Kolluru GK, et al.  
411 Methamphetamine Use and Cardiovascular Disease. *Arteriosclerosis, Thrombosis, and*  
412 *Vascular Biology*. 2019;39(9):1739-46.
- 413 2. Won S, Hong RA, Shohet RV, Seto TB, Parikh NI. Methamphetamine-associated  
414 cardiomyopathy. *Clin Cardiol*. 2013;36(12):737-42.

- 415 3. Varner KJ, Ogden BA, Delcarpio J, Meleg-Smith S. Cardiovascular Responses Elicited  
416 by the “Binge” Administration of Methamphetamine. *Journal of Pharmacology and*  
417 *Experimental Therapeutics*. 2002;301(1):152-9.
- 418 4. Heal DJ, Smith SL, Gosden J, Nutt DJ. Amphetamine, past and present--a  
419 pharmacological and clinical perspective. *J Psychopharmacol*. 2013;27(6):479-96.
- 420 5. Kirkpatrick MG, Gunderson EW, Johanson C-E, Levin FR, Foltin RW, Hart CL.  
421 Comparison of intranasal methamphetamine and d-amphetamine self-administration by  
422 humans. *Addiction (Abingdon, England)*. 2012;107(4):783-91.
- 423 6. Robertson SD, Matthies HJ, Galli A. A closer look at amphetamine-induced reverse  
424 transport and trafficking of the dopamine and norepinephrine transporters. *Molecular*  
425 *neurobiology*. 2009;39(2):73-80.
- 426 7. Fleckenstein AE, Volz TJ, Riddle EL, Gibb JW, Hanson GR. New insights into the  
427 mechanism of action of amphetamines. *Annual review of pharmacology and toxicology*.  
428 2007;47:681-98.
- 429 8. Paratz ED, Cunningham NJ, MacIsaac AI. The Cardiac Complications of  
430 Methamphetamines. *Heart, Lung and Circulation*. 2016;25(4):325-32.
- 431 9. Islam MN, Kuroki H, Hongcheng B, Ogura Y, Kawaguchi N, Onishi S, et al. Cardiac  
432 lesions and their reversibility after long term administration of methamphetamine. *Forensic*  
433 *Science International*. 1995;75(1):29-43.
- 434 10. Lopez JE, Yeo K, Caputo G, Buonocore M, Schaefer S. Recovery of methamphetamine  
435 associated cardiomyopathy predicted by late gadolinium enhanced cardiovascular magnetic  
436 resonance. *Journal of Cardiovascular Magnetic Resonance*. 2009;11(1):46.
- 437 11. MacRae CA, Peterson RT. Zebrafish as tools for drug discovery. *Nature Reviews Drug*  
438 *Discovery*. 2015;14(10):721-31.

- 439 12. Cao H, Yu F, Zhao Y, Zhang X, Tai J, Lee J, et al. Wearable multi-channel  
440 microelectrode membranes for elucidating electrophysiological phenotypes of injured  
441 myocardium. *Integrative Biology*. 2014;6(8):789-95.
- 442 13. Sander V, Suñe G, Jopling C, Morera C, Belmonte JCI. Isolation and in vitro culture of  
443 primary cardiomyocytes from adult zebrafish hearts. *Nature Protocols*. 2013;8(4):800-9.
- 444 14. Khan KM, Collier AD, Meshalkina DA, Kysil EV, Khatsko SL, Kolesnikova T, et al.  
445 Zebrafish models in neuropsychopharmacology and CNS drug discovery. *British Journal of*  
446 *Pharmacology*. 2017;174(13):1925-44.
- 447 15. Jiang M, Chen Y, Li C, Peng Q, Fang M, Liu W, et al. Inhibiting effects of  
448 rhynchophylline on zebrafish methamphetamine dependence are associated with amelioration  
449 of neurotransmitters content and down-regulation of TH and NR2B expression. *Progress in*  
450 *Neuro-Psychopharmacology and Biological Psychiatry*. 2016;68:31-43.
- 451 16. Fang M, Peng J, Zhu D, Luo C, Li C, Lin Y, et al. An In Vivo Assessment: Cardiotoxicity  
452 Induced by Three Kinds of Addictive Drugs (Methamphetamine, Ketamine, and Methadone) in  
453 Zebrafish Embryos. *International Journal of Public Health and Safety*. 2016;1(3).
- 454 17. Li J, Li J, Chen Y, Xu Y, Li W, Chen Y, et al. Methamphetamine Use Associated With  
455 Monomorphic Ventricular Tachycardia. *Journal of Addiction Medicine*. 2014;8(6):470-3.
- 456 18. Kumar S, Sharma R, Kalman JM. Unmasking of familial long QT syndrome type 2 with  
457 crystal methamphetamine exposure. *Heart Rhythm*. 2014;11(10):1836-8.
- 458 19. Haning W, Goebert D. Electrocardiographic abnormalities in methamphetamine  
459 abusers. *Addiction*. 2007;102(s1):70-5.
- 460 20. MEAKINS J. PROLONGATION OF THE "S-T" INTERVAL OF THE VENTRICULAR  
461 COMPLEX AS SHOWN BY THE ELECTROCARDIOGRAPH. *Archives of Internal Medicine*.  
462 1919;24(5):489-96.



- 463 21. Brewer KR, Kuenze G, Vanoye CG, George AL, Meiler J, Sanders CR. Structures  
464 Illuminate Cardiac Ion Channel Functions in Health and in Long QT Syndrome. *Frontiers in*  
465 *Pharmacology*. 2020;11(550).
- 466 22. Li W, Yin L, Shen C, Hu K, Ge J, Sun A. SCN5A Variants: Association With Cardiac  
467 Disorders. *Front Physiol*. 2018;9:1372-.
- 468 23. Wilde AAM, Amin AS. Clinical Spectrum of SCN5A Mutations: Long QT Syndrome,  
469 Brugada Syndrome, and Cardiomyopathy. *JACC Clinical electrophysiology*. 2018;4(5):569-79.
- 470 24. Carreras D, Martinez-Moreno R, Pinsach-Abuin MI, Santafe M, Gomà P, Brugada R, et  
471 al. Epigenetic Changes Governing Scn5a Expression in Denervated Skeletal Muscle. *Int J Mol*  
472 *Sci*. 2021;22:2755.
- 473 25. Cedar H, Bergman Y. Linking DNA methylation and histone modification: patterns and  
474 paradigms. *Nature Reviews Genetics*. 2009;10(5):295-304.
- 475 26. Wang T, Wehrens XHT. Enhanced impact of SCN5A mutation associated with long QT  
476 syndrome in fetal splice isoform. *Heart rhythm*. 2012;9(4):598-9.
- 477 27. Li H, Chen J-A, Ding Q-Z, Lu G-Y, Wu N, Su R-B, et al. Behavioral sensitization induced  
478 by methamphetamine causes differential alterations in gene expression and histone  
479 acetylation of the prefrontal cortex in rats. *BMC Neuroscience*. 2021;22(1):24.
- 480 28. Limanaqi F, Gambardella S, Biagioni F, Busceti CL, Fornai F. Epigenetic Effects  
481 Induced by Methamphetamine and Methamphetamine-Dependent Oxidative Stress. *Oxidative*  
482 *Medicine and Cellular Longevity*. 2018;2018:4982453.
- 483 29. Yin X, Guo C, Lv J, Hou S, Zhang Y, Jin X, et al. Biomimetic Accumulation of  
484 Methamphetamine and Its Metabolite Amphetamine by Diffusive Gradients in Thin Films to  
485 Estimate Their Bioavailability in Zebrafish. *Environmental Science & Technology Letters*.  
486 2019;6(12):708-13.

- 487 30. Scholz A. Mechanisms of (local) anaesthetics on voltage-gated sodium and other ion  
488 channels. *British Journal of Anaesthesia*. 2002;89(1):52-61.
- 489 31. Cakir Y, Strauch SM. Tricaine (MS-222) is a safe anesthetic compound compared to  
490 benzocaine and pentobarbital to induce anesthesia in leopard frogs (*Rana pipiens*).  
491 *Pharmacological reports : PR*. 2005;57(4):467-74.
- 492 32. Mi G, Gao Y, Yan H, Jin X, Ye E, Liu S, et al. l-Scoulerine attenuates behavioural  
493 changes induced by methamphetamine in zebrafish and mice. *Behavioural Brain Research*.  
494 2016;298:97-104.
- 495 33. Hedges DM, O Bray JD, Yorgason JT, Jang EY, Weerasekara VK, Uys JD, et al.  
496 Methamphetamine Induces Dopamine Release in the Nucleus Accumbens Through a Sigma  
497 Receptor-Mediated Pathway. *Neuropsychopharmacology*. 2018;43(6):1405-14.
- 498 34. Sugimoto K, Okamura K, Tanaka H, Takashima S, Ochi H, Yamamoto T, et al.  
499 Methamphetamine directly accelerates beating rate in cardiomyocytes by increasing Ca<sup>2+</sup>  
500 entry via L-type Ca<sup>2+</sup> channel. *Biochemical and Biophysical Research Communications*.  
501 2009;390(4):1214-20.
- 502 35. Hernandez-Lopez S, Tkatch T, Perez-Garci E, Galarraga E, Bargas J, Hamm H, et al.  
503 D2 dopamine receptors in striatal medium spiny neurons reduce L-type Ca<sup>2+</sup> currents and  
504 excitability via a novel PLC[ $\beta$ ]1-IP3-calcineurin-signaling cascade. *The Journal of*  
505 *neuroscience : the official journal of the Society for Neuroscience*. 2000;20(24):8987-95.
- 506

507

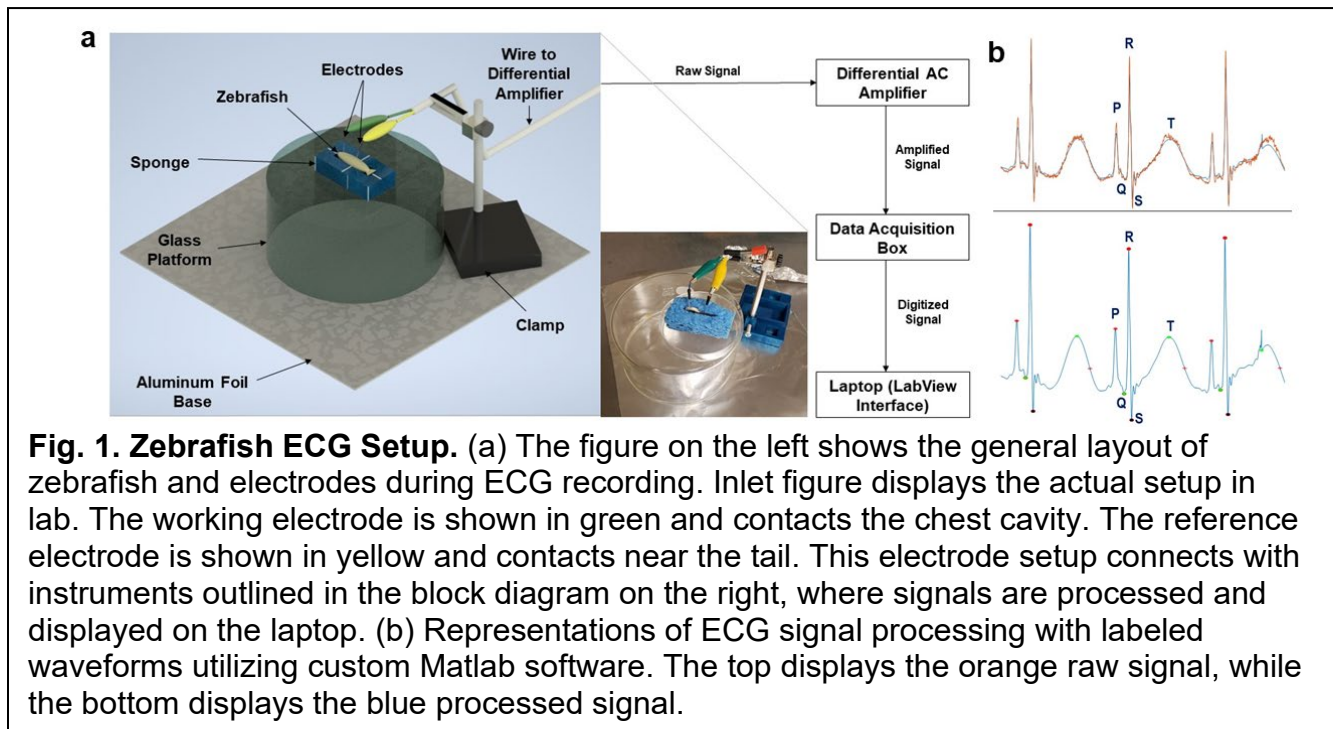

508

509

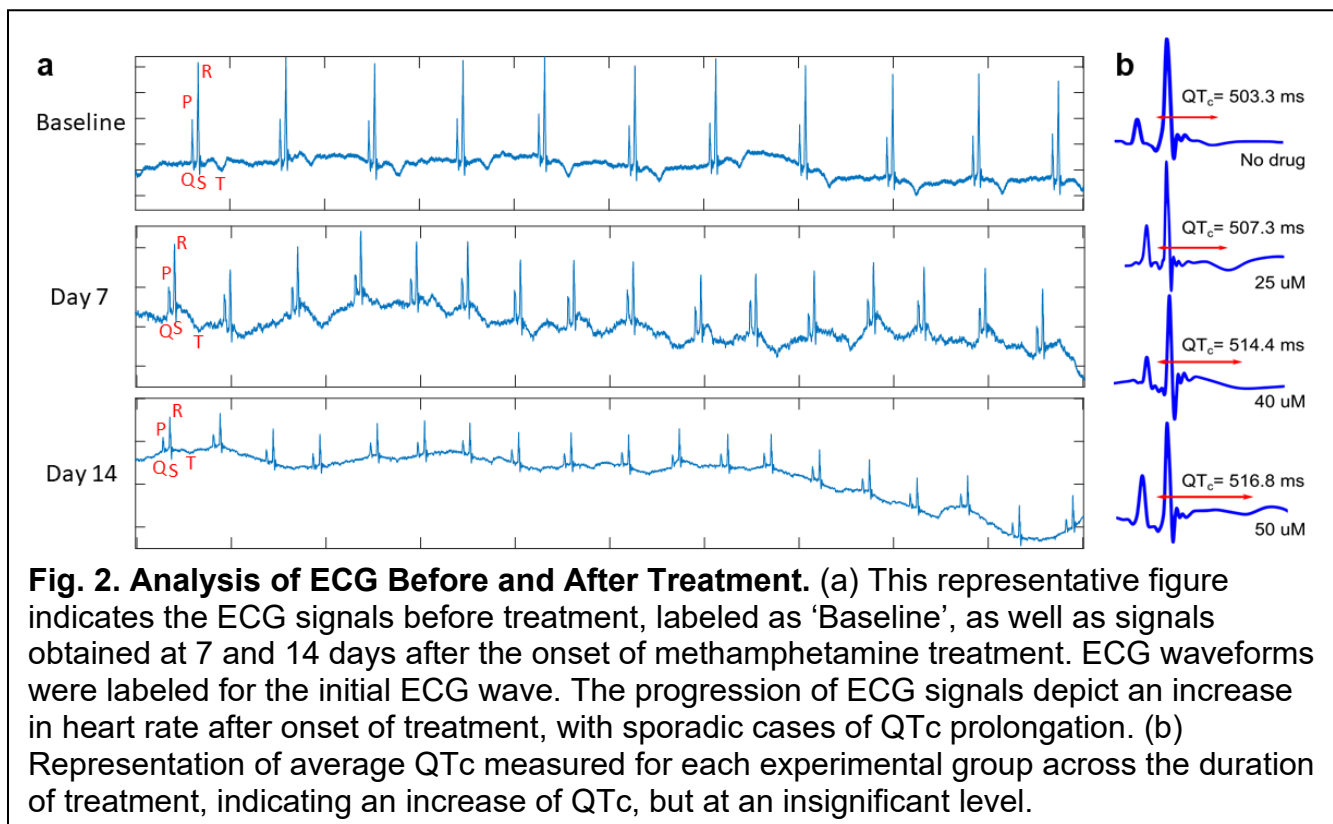

510

511

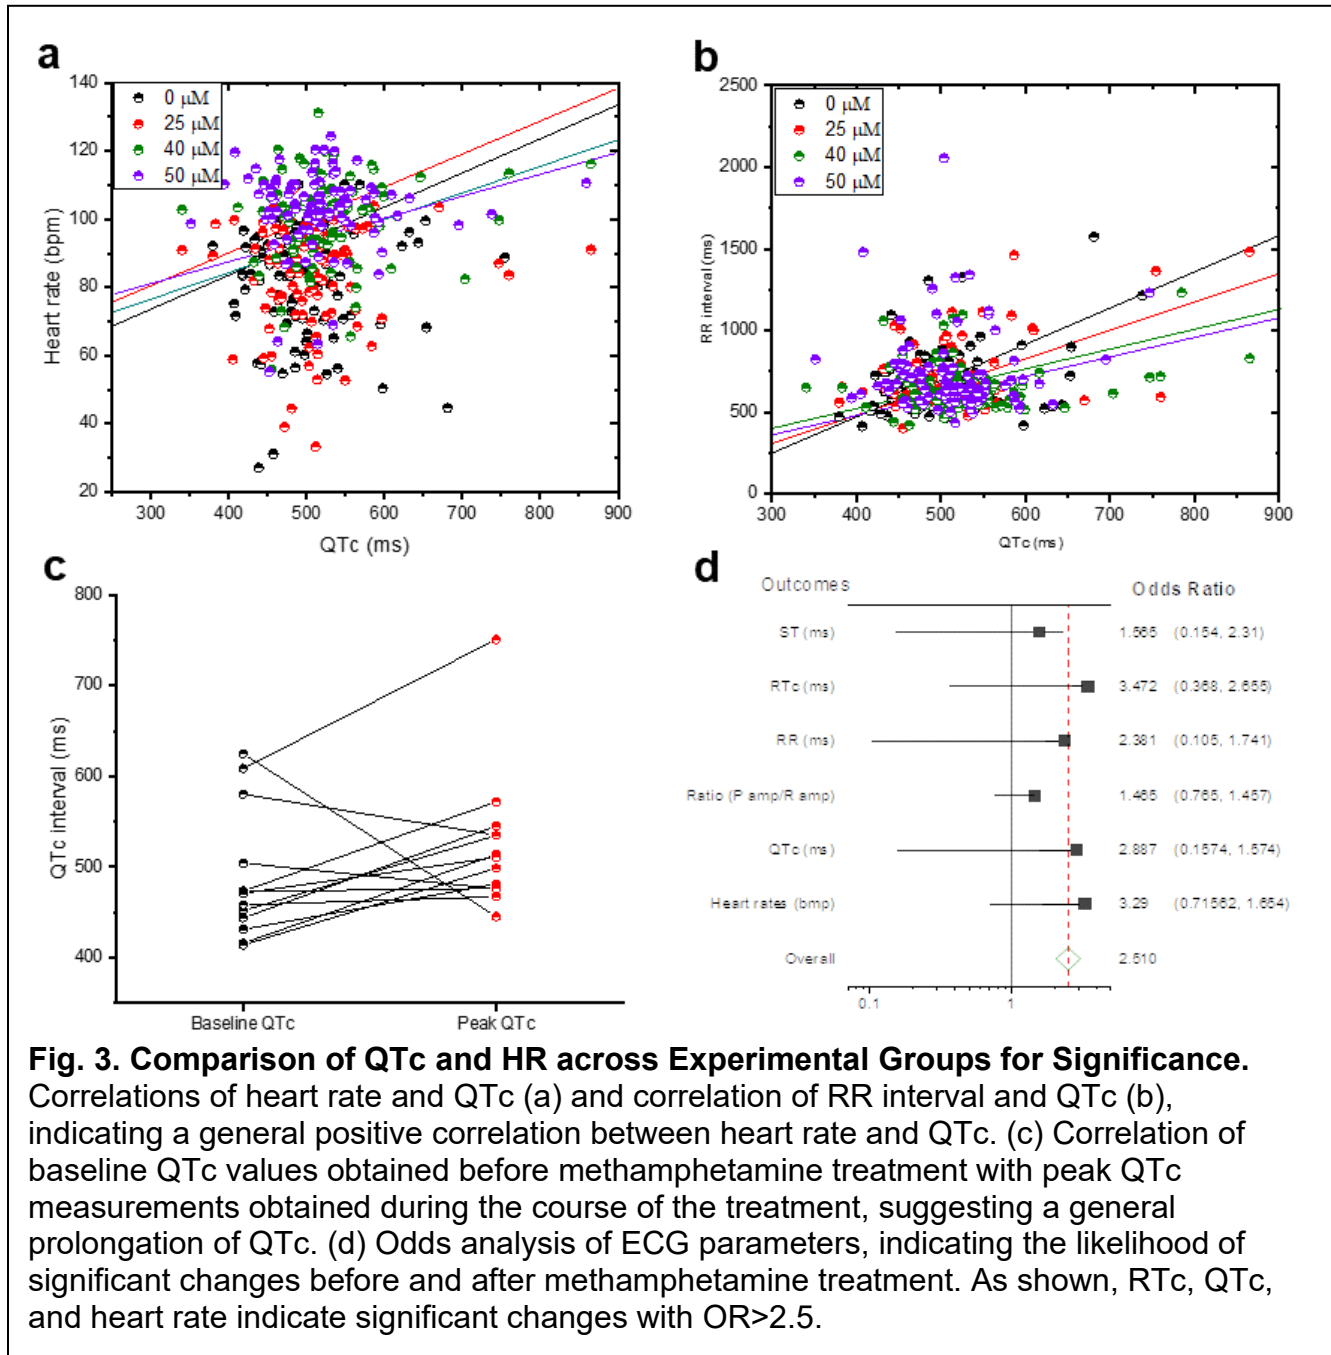

512

513

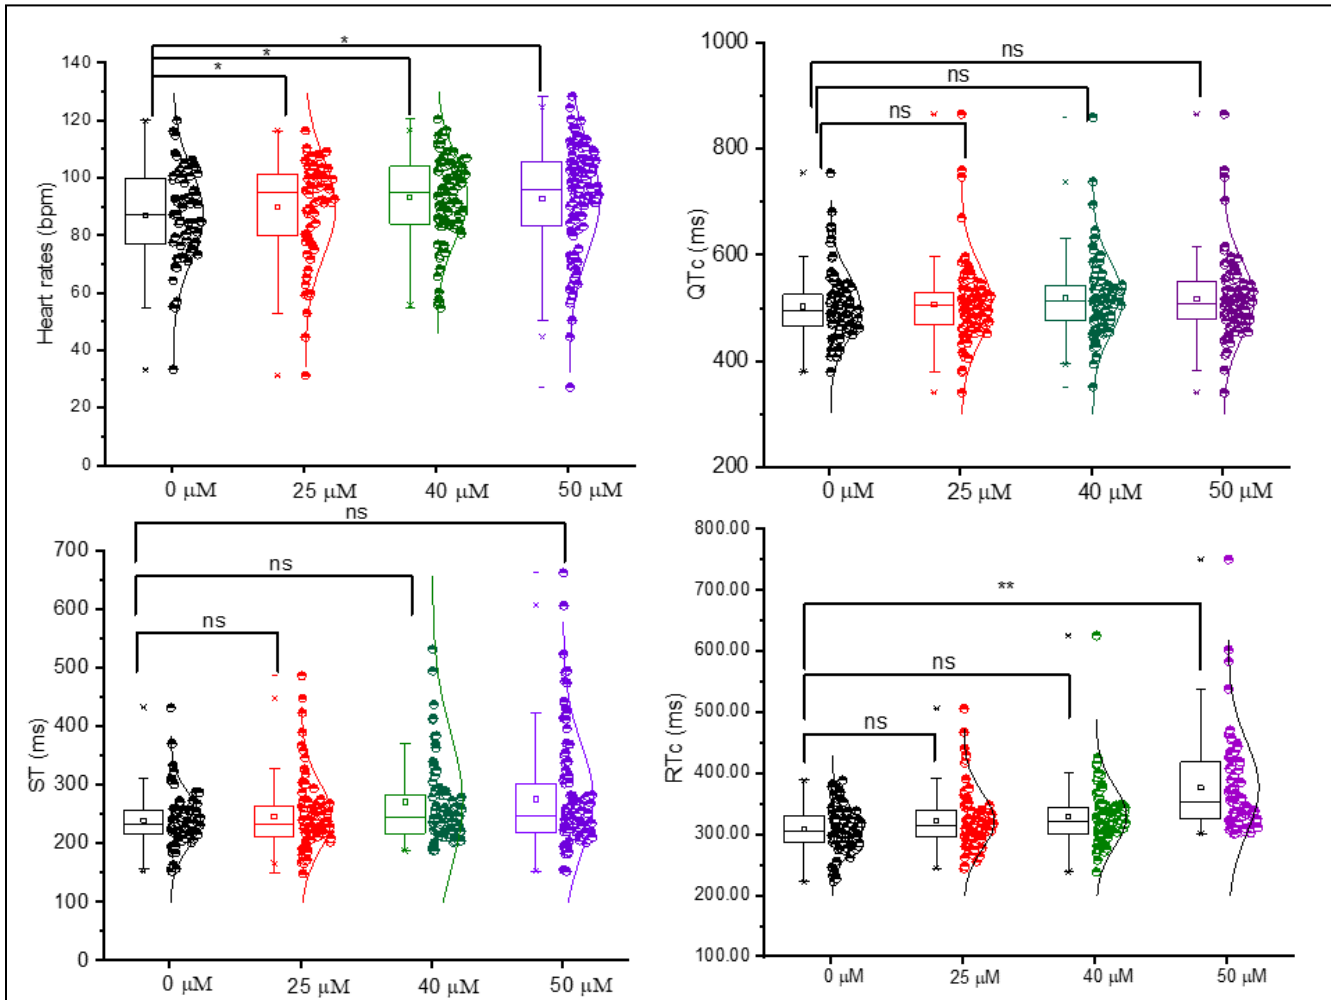

**Fig. 4. Analysis of specific ECG parameters between experimental groups.** Aggregate measurements were plotted for each experimental group for comparative analysis. Based on significance testing, heart rate exhibited significant increases across all experimental groups, supporting that methamphetamine induces increased heart rate in zebrafish. Other parameters (QTc, RTc, and ST) displayed little to no significance across experimental groups. \* indicates  $p < 0.05$ . *ns* indicates no significance.

514

515

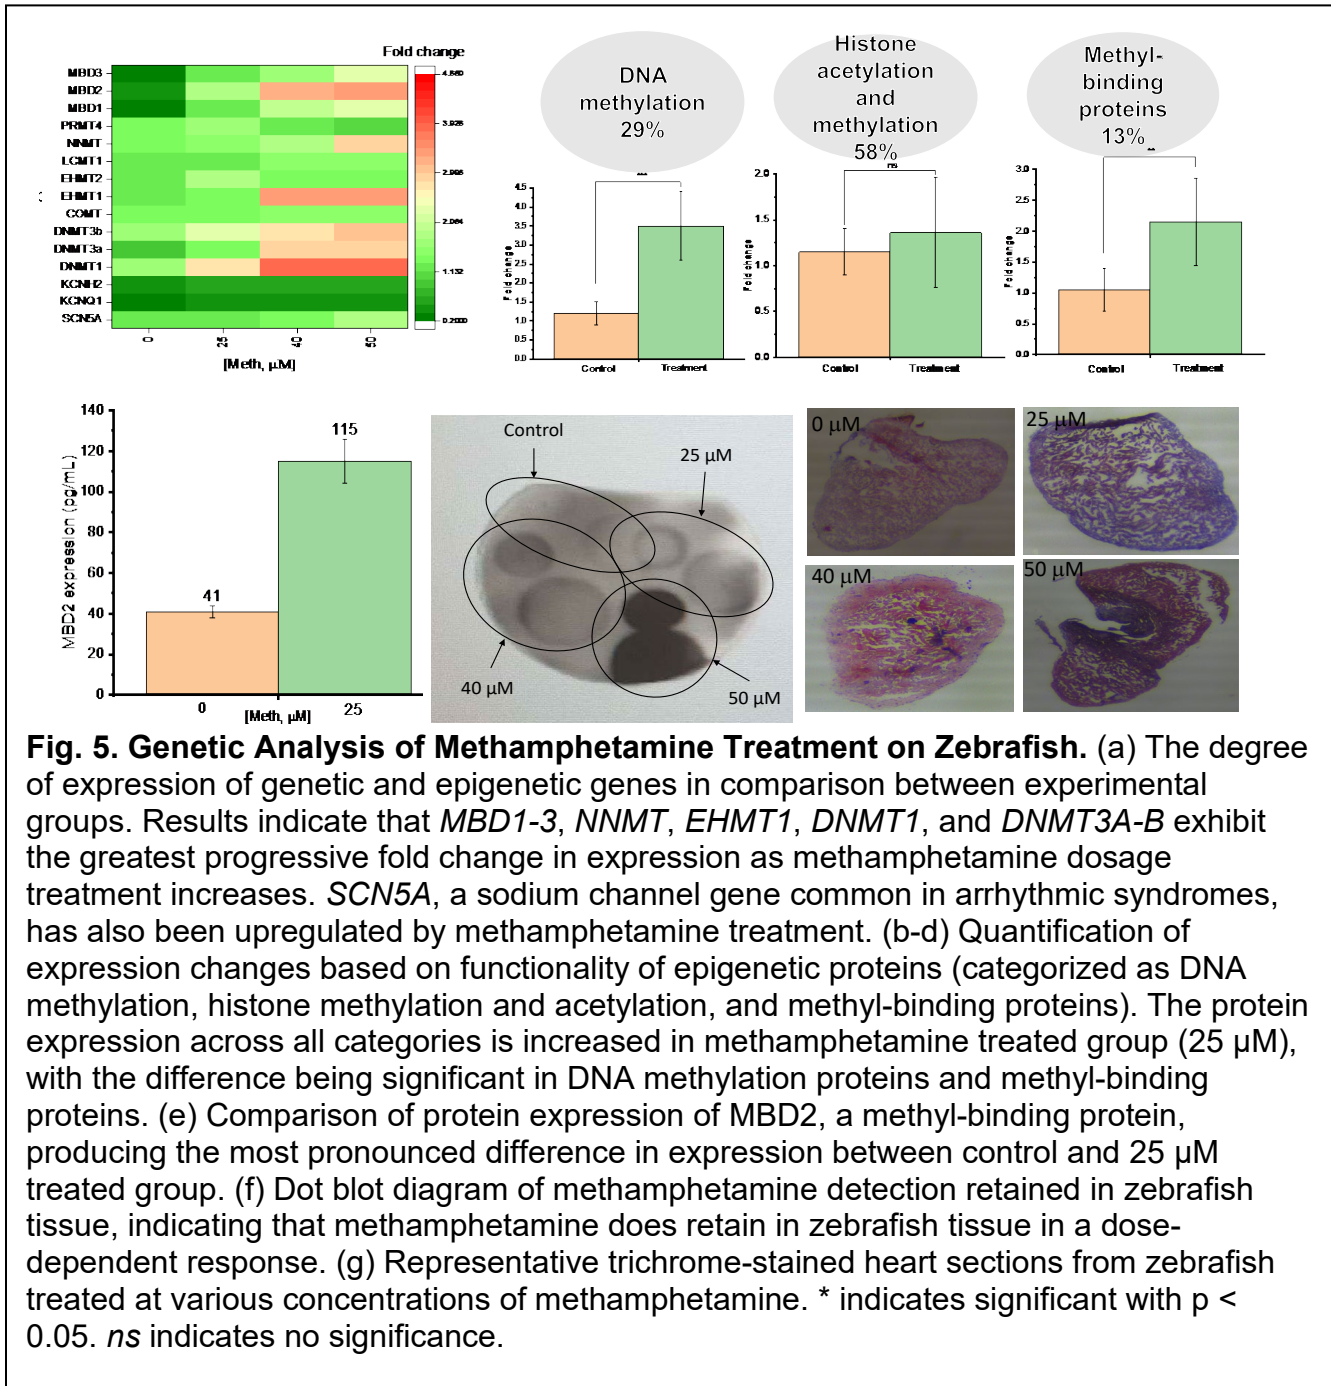

516

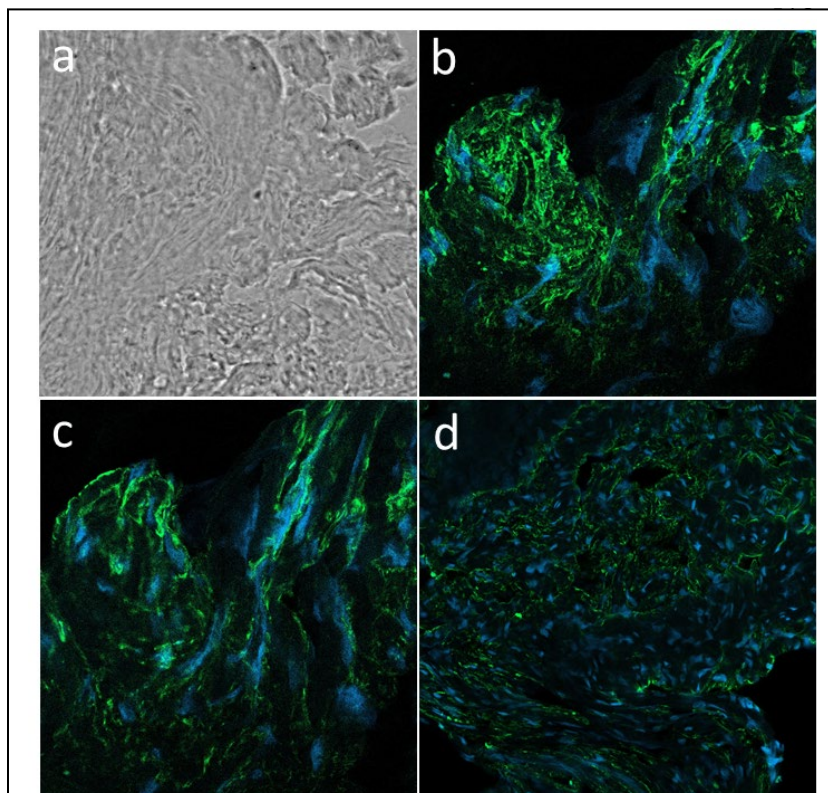

**Fig. 6. Representative Immunostaining of Methamphetamine and Epigenetic Proteins.** (a) Brightfield image of zebrafish heart tissue. (b-d) Immunostaining of methamphetamine (b), DMNT (c), and MBD (d) within heart tissue of methamphetamine treatment group. Antibodies were conjugated with Alexa Fluor 488 to indicate presence of proteins with green fluorescence. Magnification 40X
